# Supplementary material for: A New Characterization of the Upper Waters of the central Gulf of México based on Water Mass Hydrographic and Biogeochemical Characteristics
Source: Copernicus journal article supplement (doi:10.5194/bg-2019-340), 2019-09-23
Supplement: Supplementary file 1 [file bg-2019-340-supplement.pdf]

1 SUPPLEMENTARY MATERIAL

2 **Supplementary Figure 1:** The vertical distribution [250 m] of apparent oxygen utilization  
3 [ $\mu\text{mol}\cdot\text{kg}^{-1}$ ] are shown for the late fall of 2010 (a), winter of 2103 (b) and summers of 2011  
4 (c), 2015 (d), and 2016 (e). The white contours indicate the lower limit of CSW [ $24\text{ kg}\cdot\text{m}^{-3}$ ]  
5 and GCW [ $26\text{ kg}\cdot\text{m}^{-3}$ ] in all sections. The location of the transect is shown in figure 1c.  
6

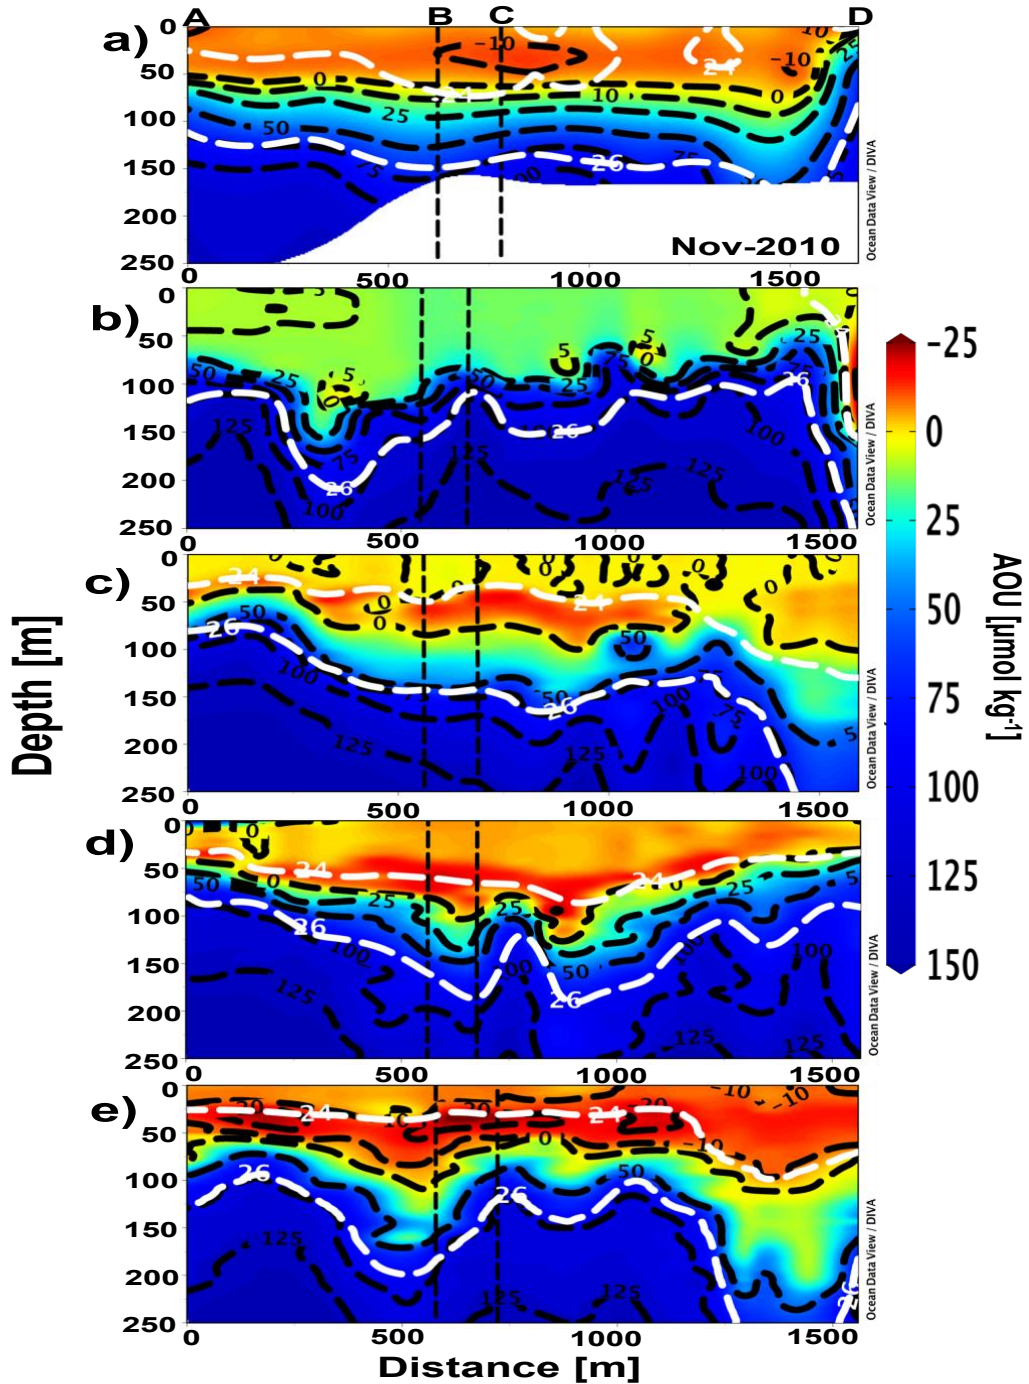

7  
8  
9

10 **Supplementary Figure 2:** A comparison of later fall (a) and summers (b and c) conditions  
11 of the variability of the depth of  $26 \text{ kg} \cdot \text{m}^{-3}$  density field in the GoM (in situ hydrographic  
12 data collected in November 2013, July 2011 and June 2016, respectively).  
13

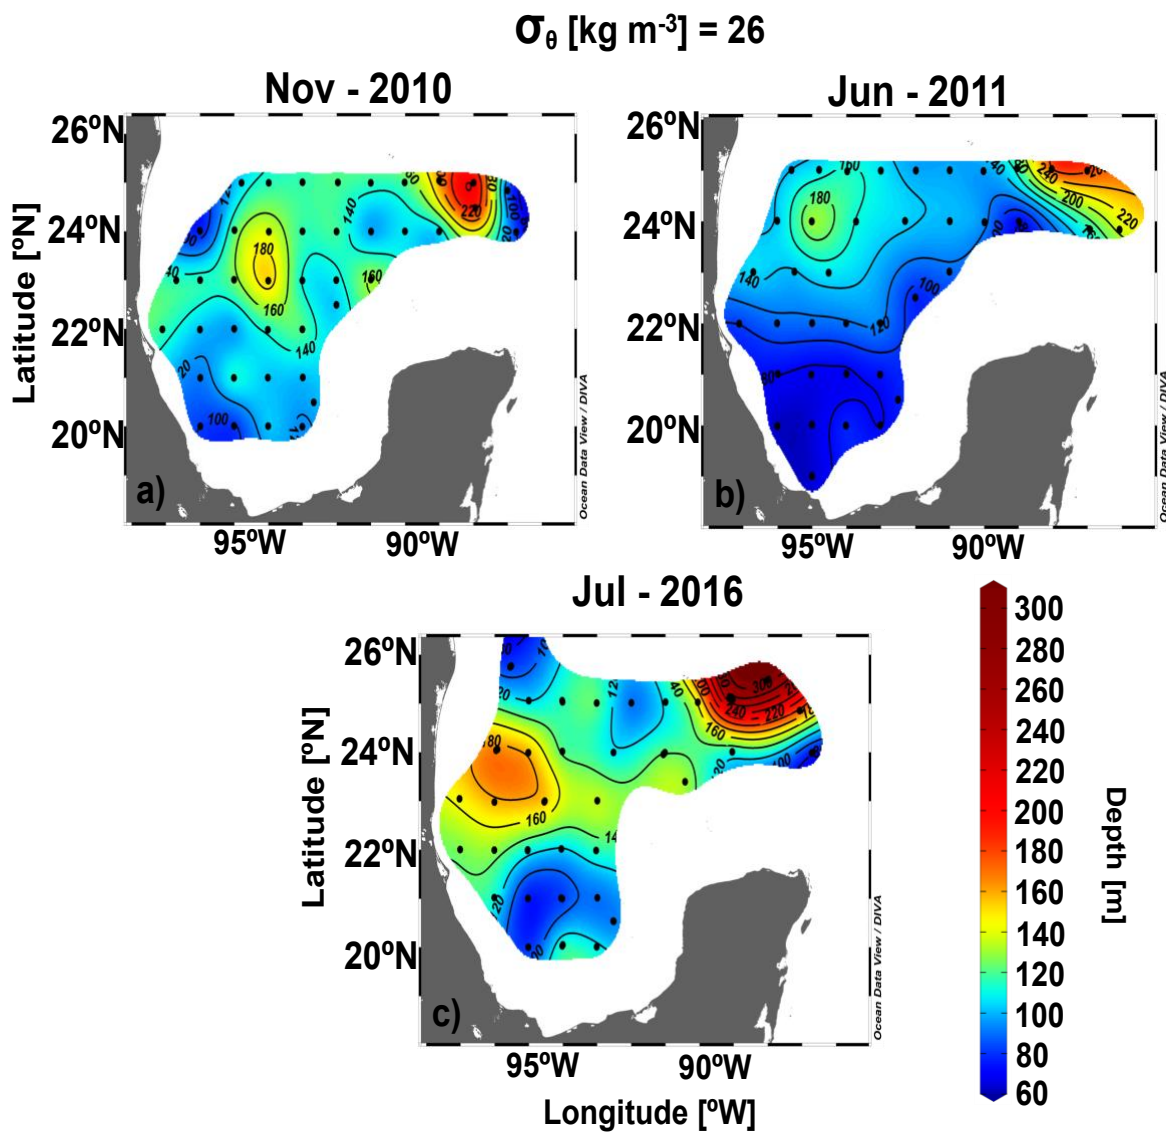

14  
15  
16  
17  
18  
19  
20  
21  
22  
23  
24  
25  
26

27 **Supplementary Figure 3:** The vertical distribution [250 m] of apparent oxygen utilization  
28 [ $\mu\text{mol}\cdot\text{kg}^{-1}$ ] are shown for the summers of 2011 (a), 2015 (b), and 2016 (c). The white  
29 contours indicate the maximum of the fluorescence. The location of the transect is shown in  
30 figure 1c.  
31

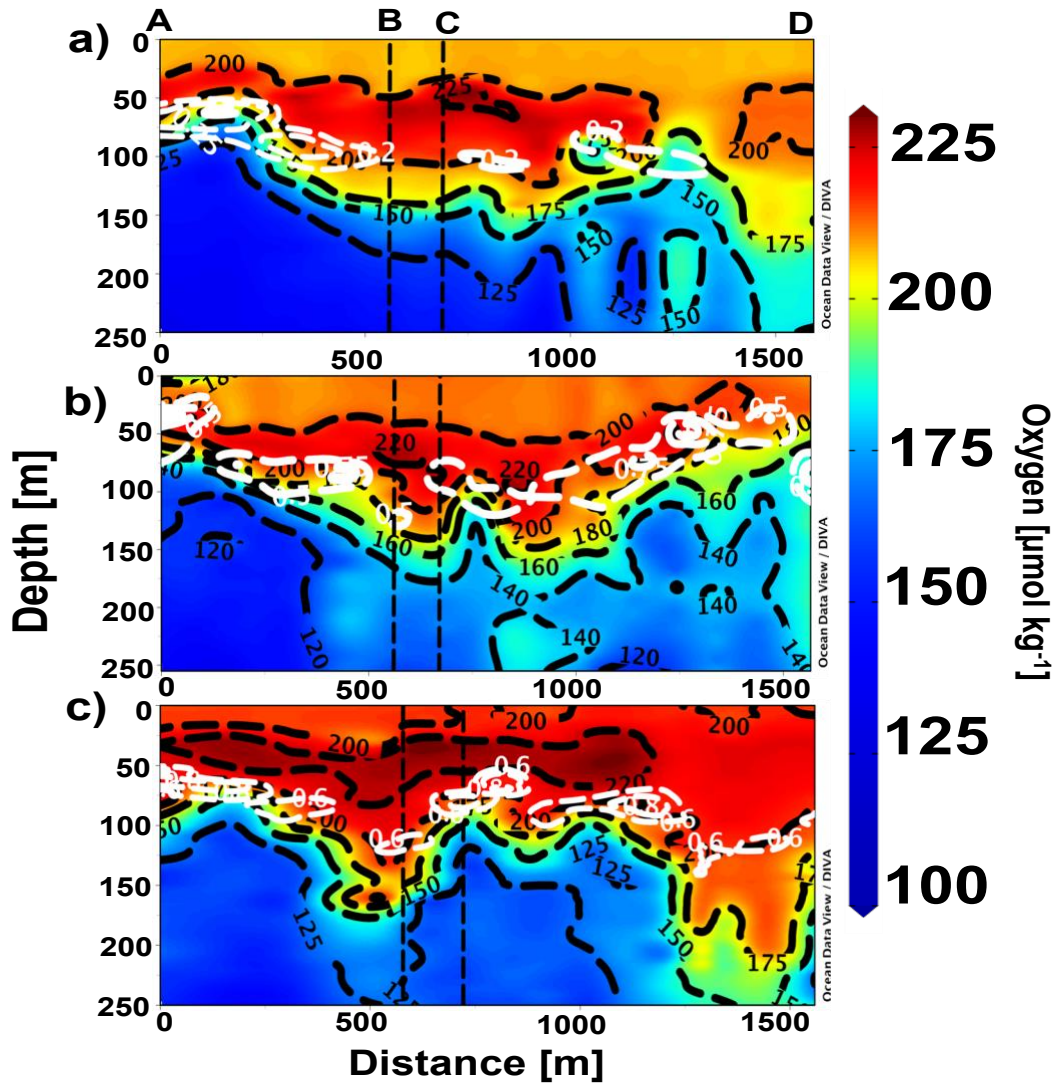

32  
33  
34
